# Supplementary material for: Simultaneous encapsulation of an infinite T4(0)A(0)6(0) water tape and discrete water hexamers in a hydrogen-bonded Ag(i) supramolecular framework
Source: Royal Society of Chemistry journal article supplement (doi:10.1039/c4dt00494a), 2014-01-01
Supplement: c4dt00494a1.pdf [file c4dt00494a1.pdf]

**Electronic Supplementary Information (ESI) for *Dalton Transactions***

**Simultaneous encapsulation of infinite T4(0)A(0)6(0) water tape and discrete water hexamer in a hydrogen-bonded Ag(I) supramolecular framework**

**Lu-Lu Han,<sup>a</sup> Tuo-Ping Hu,<sup>b</sup> Jiang-Shan Chen,<sup>a</sup> Zhong-Hui Li,<sup>a</sup> Xing-Po Wang,<sup>a</sup> Ya-Qin Zhao,<sup>a</sup> Xiao-Yu Li,<sup>a</sup> Di Sun,<sup>\* a</sup>**

*<sup>a</sup>Key Lab of Colloid and Interface Chemistry, Ministry of Education, School of Chemistry and Chemical Engineering, Shandong University, Jinan, Shandong, 250100, China.*

*E-mail: dsun@sdu.edu.cn*

*<sup>b</sup>Department of Chemistry, North University of China, Taiyuan, Shanxi 030051, People's Republic of China.*

***Content***

|                                                                                                                 |          |
|-----------------------------------------------------------------------------------------------------------------|----------|
| <b>(1) Table S1: The <math>\pi \cdots \pi</math> interactions in 1 .....</b>                                    | <b>2</b> |
| <b>(2) Fig. S1: The C-H <math>\cdots \pi</math> interaction.....</b>                                            | <b>3</b> |
| <b>(3) Fig. S2: The XRD patterns of 1. ....</b>                                                                 | <b>4</b> |
| <b>(4) Fig. S3: IR of 1, dehydrated and rehydrated 1. ....</b>                                                  | <b>5</b> |
| <b>(5) Elemental analysis for 1, dehydrated and rehydrated 1. ....</b>                                          | <b>5</b> |
| <b>(6) Table S2: Different water clusters found in Ag(I)/bipyridine-based ligand dicarboxylate system .....</b> | <b>6</b> |

**(1) Table S1: The  $\pi \cdots \pi$  interactions in 1**

|                                  |            |
|----------------------------------|------------|
| Cg1 $\cdots$ Cg2 <sup>viii</sup> | 3.738(2)   |
| Cg1 $\cdots$ Cg3 <sup>ix</sup>   | 3.637(2)   |
| Cg2 $\cdots$ Cg2 <sup>ix</sup>   | 3.7011(19) |
| Cg3 $\cdots$ Cg4 <sup>x</sup>    | 3.730(2)   |
| Cg4 $\cdots$ Cg4 <sup>xi</sup>   | 3.8642(19) |
| Cg5 $\cdots$ Cg5 <sup>viii</sup> | 3.857(2)   |
| Cg6 $\cdots$ Cg6 <sup>x</sup>    | 3.829(2)   |

Cg1 to Cg6 are the centroids of N1/C1/C2/C3/C4/C5, N2/C12/C13/C14/C15/C16, N3/C17/C18/C19/C20/C21, N4/C28/C29/C30/C31/C32, C6/C7/C8/C9/C10/C11 and C22/C23/C24/C25/C26/C27.

Symmetry code: (viii) -1-x, 1-y, 1-z; (ix) -x, 1-y, 1-z; (x) 1-x, -y, 2-z; (xi) 2-x, -y, 2-z.

**(2) Fig. S1: The C-H $\cdots$  $\pi$  interaction**

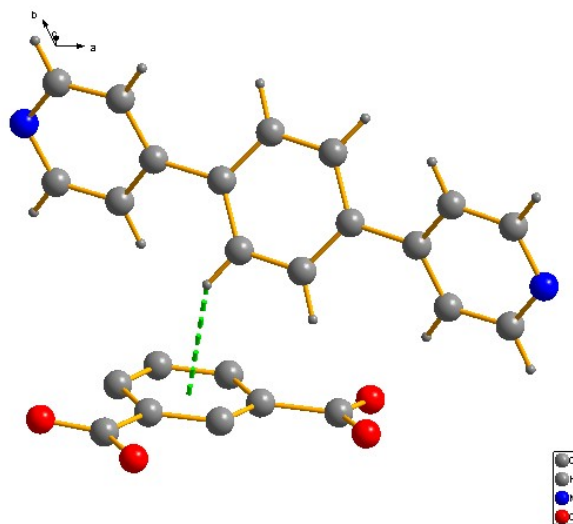

**(3) Fig. S2: The XRD patterns of 1.**

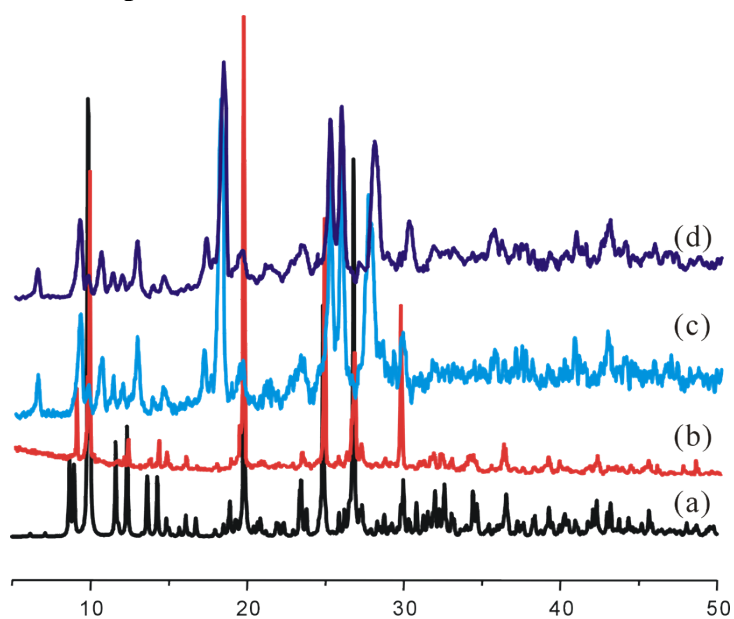

PXRD pattern of **1**: (a) simulated, (b) as-synthesized, (c) heated at 150 °C for 2 h and (d) rehydrated.

**(4) Fig. S3: IR of 1, dehydrated and rehydrated 1.**

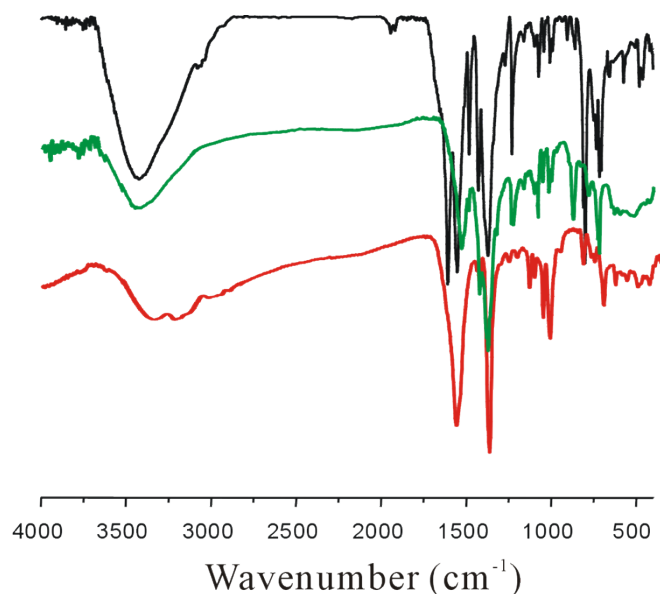

IR of **1**: (Black line) as-synthesized, (Green line) heated at 150 °C for 2 h and (red line) rehydrated **1**.

**(5) Elemental analysis for 1, dehydrated and rehydrated 1.**

Elemental Analysis for  $[\text{Ag}_2(\text{dpb})_2(\text{bdc})\cdot 9\text{H}_2\text{O}]_n$  (**1**,  $\text{C}_{40}\text{H}_{46}\text{Ag}_2\text{N}_4\text{O}_{13}$ ): C, 47.73 (47.59); H, 4.60 (3.98); N, 5.57 (5.30) %.

Elemental Analysis for dehydrated **1**: C, 55.62; H, 3.37; N, 6.41 %, resulting in a approximate formula of  $[\text{Ag}_2(\text{dpb})_2(\text{bdc})\cdot \text{H}_2\text{O}]_n$  (calculated C, H, N contents: C, 55.71; H, 3.51; N, 6.50 %)

Elemental Analysis for rehydrated **1**: C, 56.13; H, 3.62; N, 6.03 %, resulting in a approximate formula of  $[\text{Ag}_2(\text{dpb})_2(\text{bdc})\cdot \text{H}_2\text{O}]_n$  (calculated C, H, N contents: C, 55.71; H, 3.51; N, 6.50 %)

**(6) Table S2: Different water clusters found in Ag(I)/bipyridine-based ligand dicarboxylate system**

| Complex                                | Water cluster                                                                        | Ref.                                               |
|----------------------------------------|--------------------------------------------------------------------------------------|----------------------------------------------------|
| Ag/1,2-bis(4-pyridyl)ethane/succinate  | 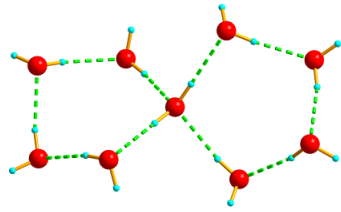   | <i>Cryst. Growth Des.</i> , 2011, <b>11</b> , 1948 |
| Ag/1,3-bis(4-pyridyl)propane/succinate |    | <i>Cryst. Growth Des.</i> , 2011, <b>11</b> , 1948 |
| Ag/4,4'-bipyridine/succinate           |   | <i>Inorg. Chem. Commun.</i> , 2006, <b>9</b> , 691 |
| Ag/4,4'-bipyridine/oxalate             |  | <i>Cryst Growth Des.</i> , 2010, <b>10</b> , 4642  |
| Ag/4,4'-bipyridine/adipate             |  | <i>Cryst Growth Des.</i> , 2010, <b>10</b> , 4642  |
| Ag/4,4'-bipyridine/suberate            |  | <i>J Mol Struct.</i> , 2011, <b>1004</b> , 313     |
| Ag/4,4'-bipyridine/azelate             |  | <i>J Mol Struct.</i> , 2011, <b>1004</b> , 313     |
